# Supplementary material
Source: PubMed Central journal article supplement (PMC1324994)

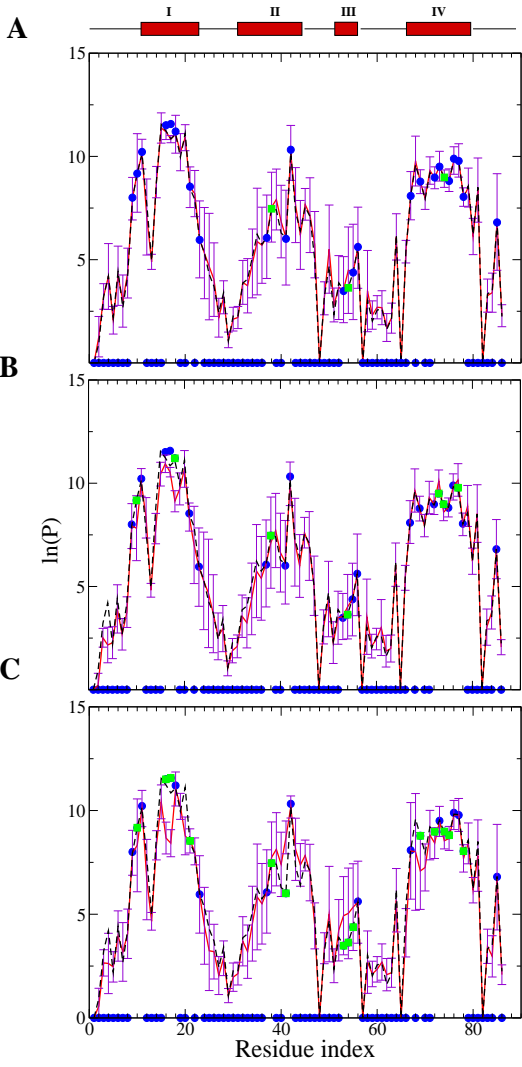

Supplement: pnas_0508667102_2.pdf [file pnas_0508667102_2.pdf]

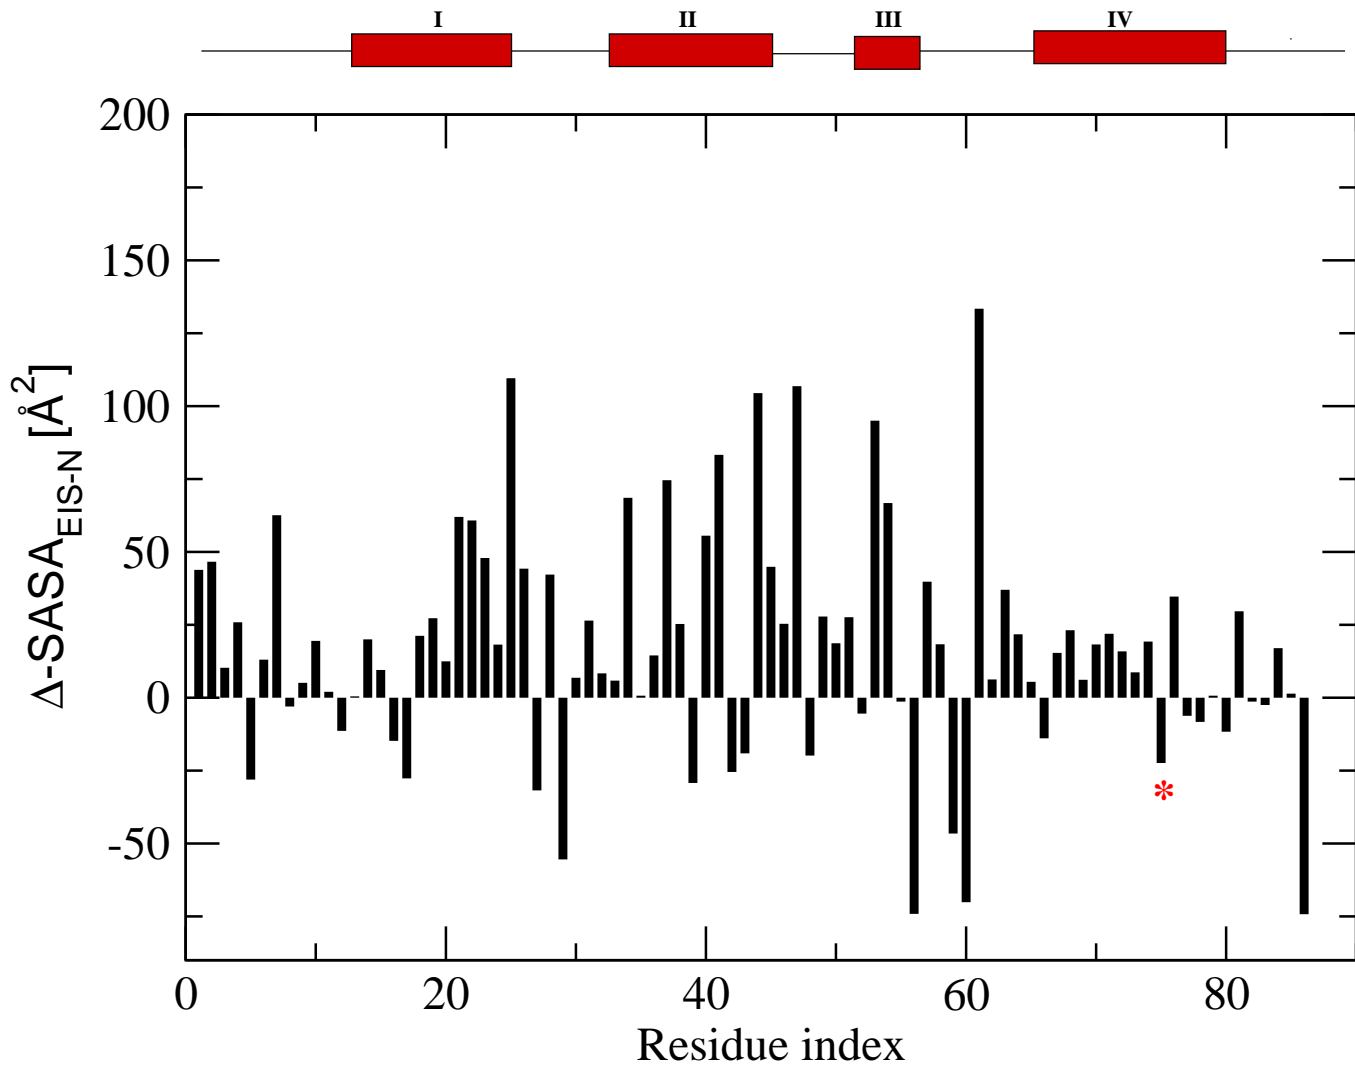

Supplement: pnas_0508667102_7.pdf [file pnas_0508667102_7.pdf]
